# Supplementary material for: Beta-Hydroxybutyrate (BHB), Glucose, Insulin, Octanoate (C8), and Decanoate (C10) Responses to a Medium-Chain Triglyceride (MCT) Oil with and without Glucose: A Single-Center Study in Healthy Adults
Source: MDPI journal article supplement (doi:10.3390/nu15051148), 2023-02-24
Supplement: s1 [file s1]

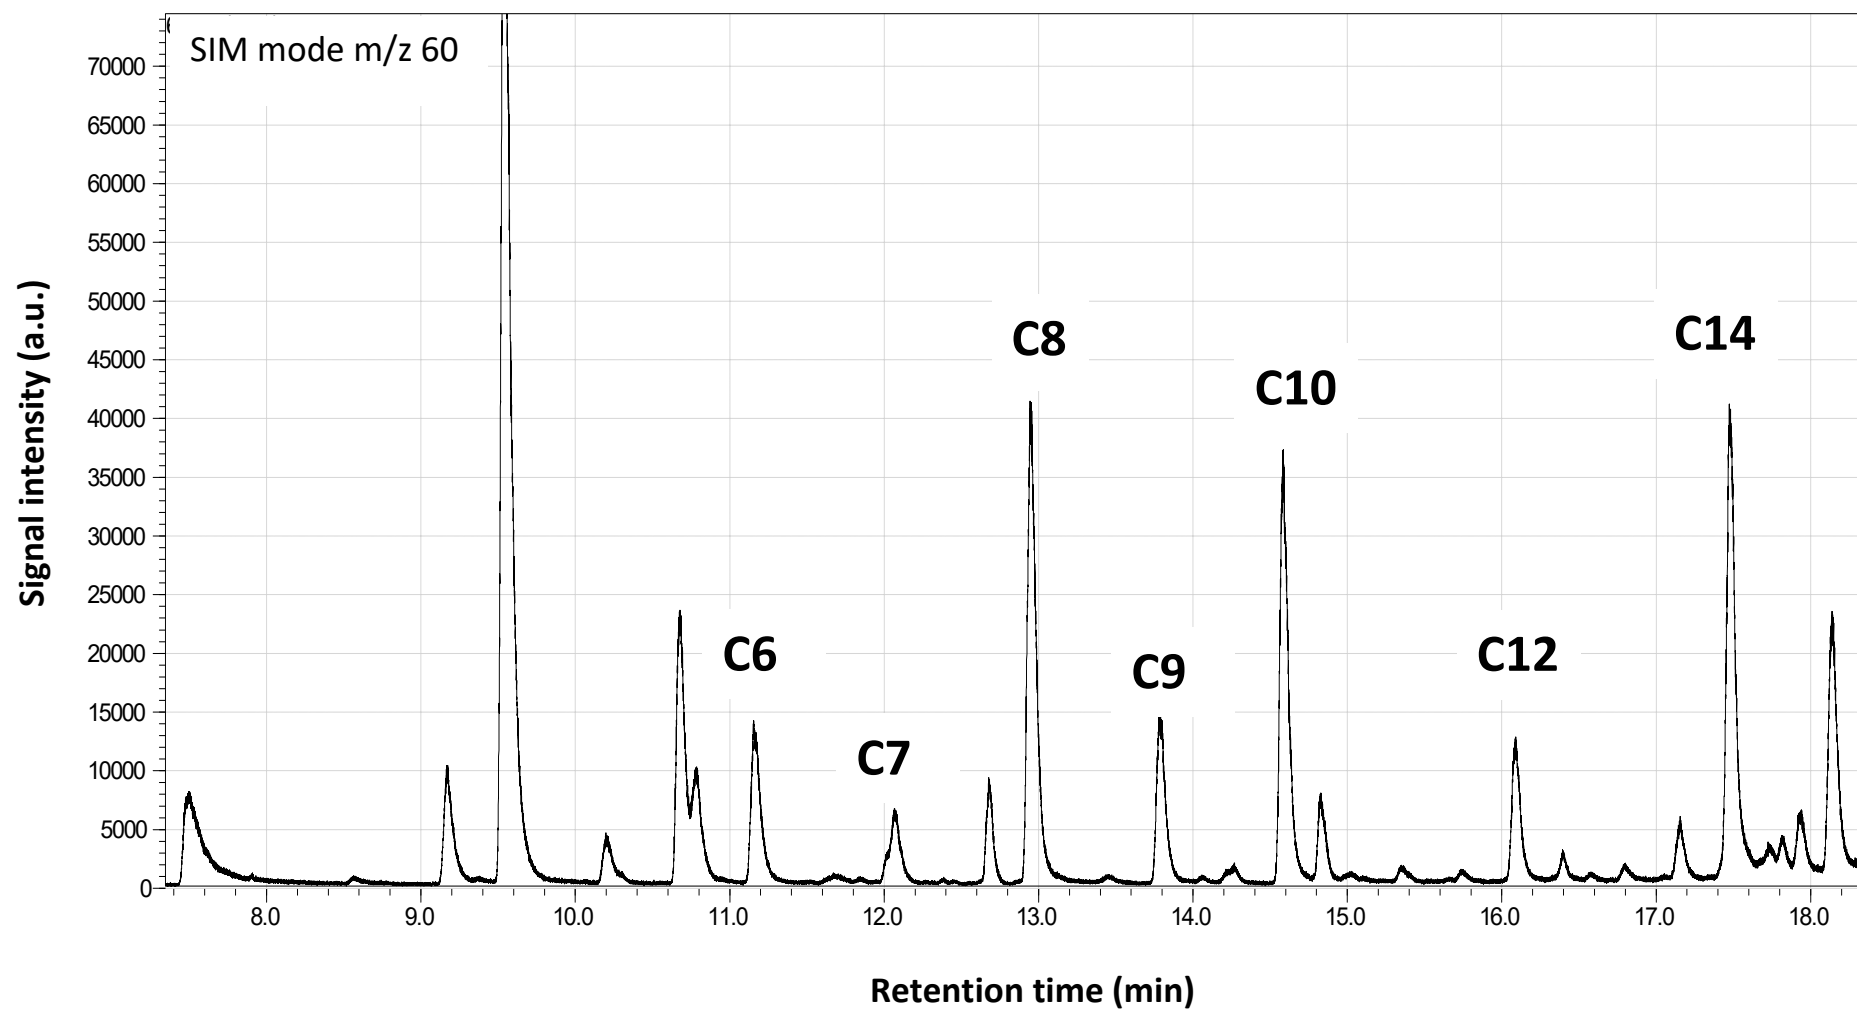

**Figure S1:** Base peak intensity chromatogram of medium-chain fatty acids and their labelled isotopes by gas chromatography-single quadrupole mass spectrometry.
