# Supplementary material for: Beta-Hydroxybutyrate (BHB), Glucose, Insulin, Octanoate (C8), and Decanoate (C10) Responses to a Medium-Chain Triglyceride (MCT) Oil with and without Glucose: A Single-Center Study in Healthy Adults
Source: MDPI journal article supplement (doi:10.3390/nu15051148), 2023-02-24

MCT

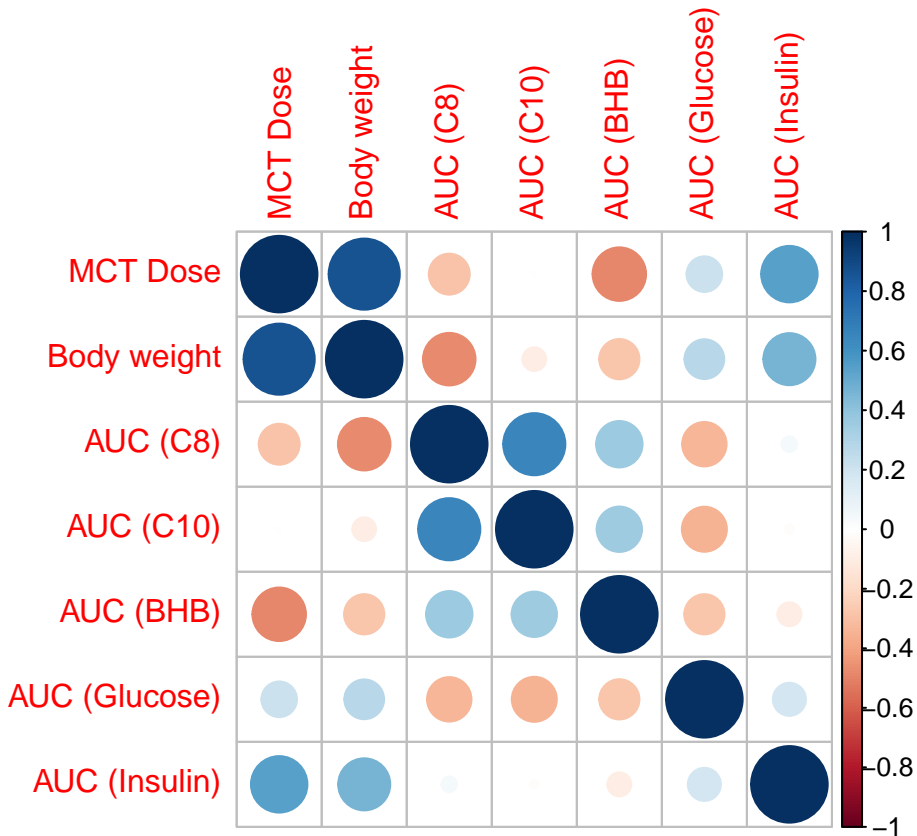

MCT+G

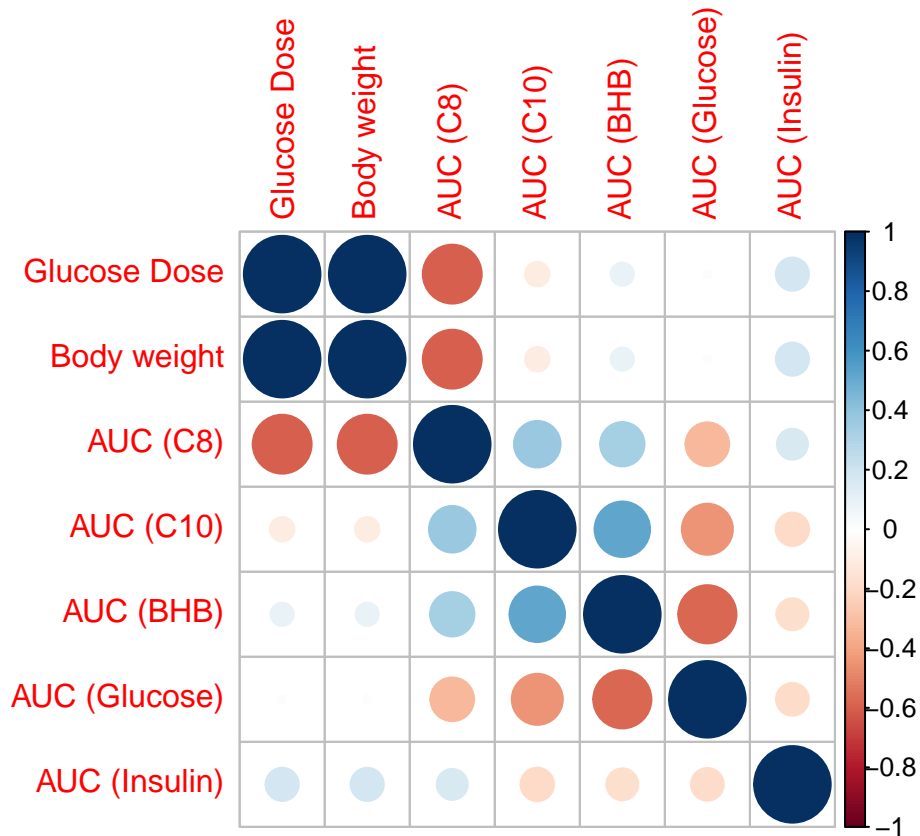

The correlation matrix shows the following approximate correlation coefficients (r) for the variables:

|               | MCT Dose | Body weight | AUC (C8) | AUC (C10) | AUC (BHB) | AUC (Glucose) | AUC (Insulin) |
|---------------|----------|-------------|----------|-----------|-----------|---------------|---------------|
| MCT Dose      | 1.00     | 0.85        | 0.00     | 0.00      | -0.15     | 0.00          | 0.40          |
| Body weight   | 0.85     | 1.00        | -0.20    | 0.40      | 0.00      | 0.00          | 0.35          |
| AUC (C8)      | 0.00     | -0.20       | 1.00     | 0.50      | 0.00      | 0.00          | 0.00          |
| AUC (C10)     | 0.00     | 0.40        | 0.50     | 1.00      | 0.00      | 0.00          | 0.00          |
| AUC (BHB)     | -0.15    | 0.00        | 0.00     | 0.00      | 1.00      | 0.00          | 0.00          |
| AUC (Glucose) | 0.00     | 0.00        | 0.00     | 0.00      | 0.00      | 1.00          | 0.00          |
| AUC (Insulin) | 0.40     | 0.35        | 0.00     | 0.00      | 0.00      | 0.00          | 1.00          |

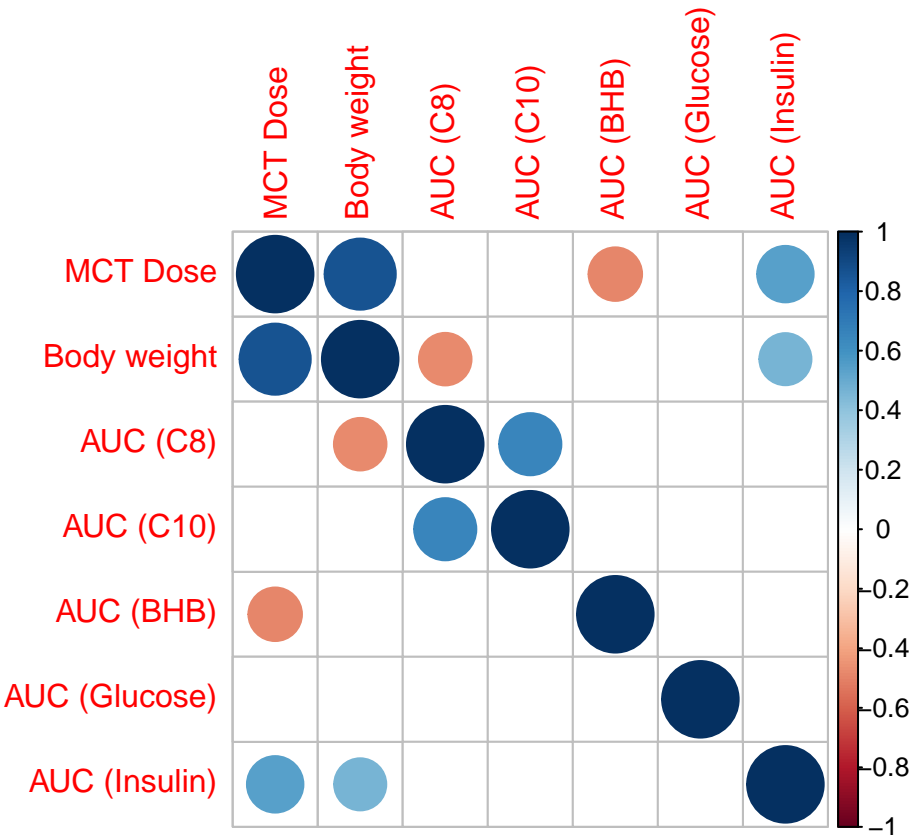[illegible]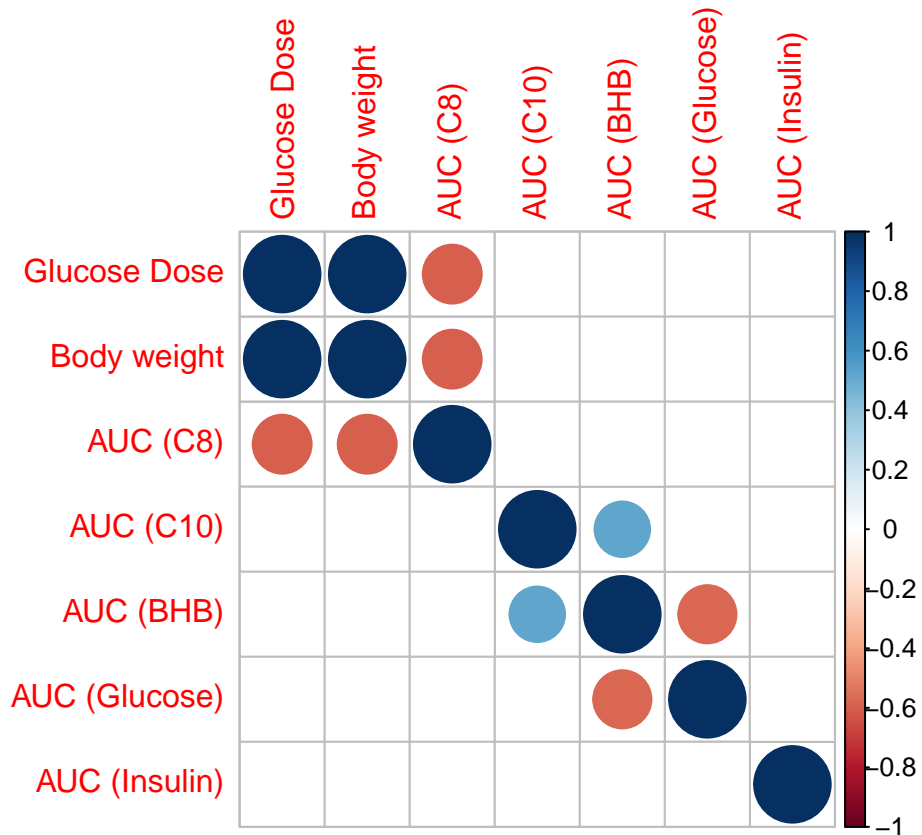

Supplement: s1 [file s1]
